# Supplementary material for: Preparation of Hollow Niobium Oxide Nanospheres with Enhanced Catalytic Activity for Oxidative Desulfurization
Source: MDPI journal article supplement (doi:10.3390/nano12071106), 2022-03-28
Supplement: s1 [file s1]

Supplementary Materials

# Preparation of Hollow Niobium Oxide Nanospheres with Enhanced Catalytic Activity for Oxidative Desulfurization

Yong Wang <sup>1,\*</sup>, Lei Ren <sup>1</sup>, Zifeng Li <sup>1</sup> and Feng Xin <sup>2</sup>

<sup>1</sup> Sinopec Research Institute of Petroleum Processing, Beijing 100083, China; renlei.ripp@sinopec.com (L.R.); lizf.ripp@sinopec.com (Z.L.)

<sup>2</sup> School of Chemical Engineering and Technology, Tianjin University, Tianjin 300350, China; xinf@tju.edu.cn

\* Correspondence: wangyong.ripp@sinopec.com; Tel.: +86-010-82368908

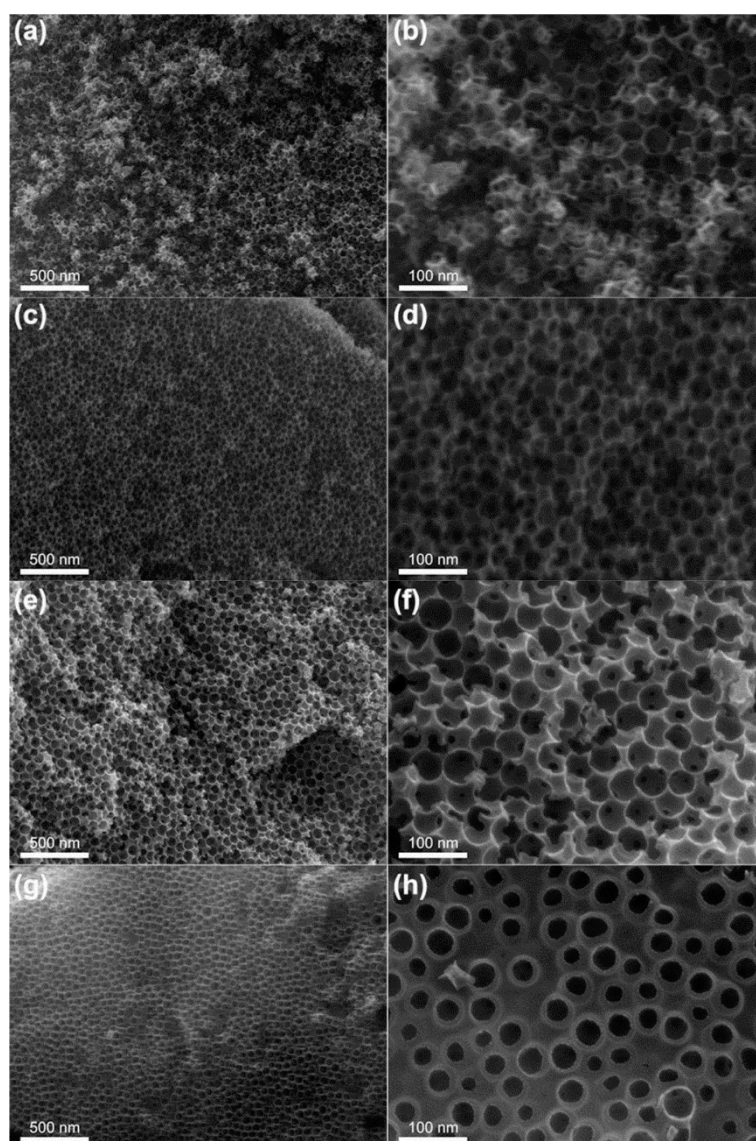

**Figure S1.** SEM images of carbons prepared by different mass ratios of silica to histidine (a,b) 1:0.5, (c,d) 1:1.0, (e,f) 1:1.5, (g,h) 1:2.0.

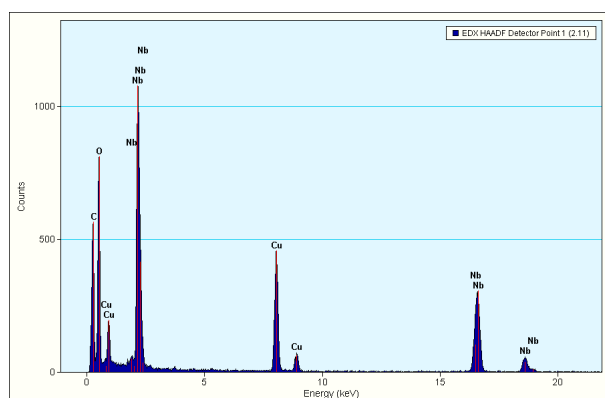

**Figure S2.** EDX pattern of the as-synthesized hollow Nb<sub>2</sub>O<sub>5</sub> nanospheres.
